# Supplementary material for: SPIRIT-CONSORT-TM: a corpus for assessing transparency of clinical trial protocol and results publications
Source: bioRxiv or medRxiv preprint supplement (doi:10.1101/2025.01.14.25320543), 2025-01-15
Supplement: Supplementary file [file media-1.pdf]

## Supplementary Information for *SPIRIT-CONSORT-TM: a corpus for assessing transparency of clinical trial protocol and results publications*

Lan Jiang, Colby J Vorland, Xiangji Ying, Andrew W Brown, Joe D Menke, Gibong Hong, Mengfei Lan, Evan Mayo-Wilson, and Halil Kilicoglu

We provide token-level statistics for the training, validation, and test splits of the SPIRIT-CONSORT-TM corpus, along with item-level details, and item-level performance of the NLP models below.

Table S1 presents the token-level statistics of the dataset across training, validation, and test splits.

| Split      | Total no. of tokens | Mean (SD)           | Median (IQR)        |
|------------|---------------------|---------------------|---------------------|
| Training   | 854,289             | 6,102.06 (1,953.11) | 5,918.00 (2,003.50) |
| Validation | 108,870             | 5,443.50 (1,094.30) | 5,695.00 (1,434.25) |
| Test       | 247,948             | 6,198.70 (1,870.28) | 6,098.00 (1,621.50) |

**Table S1.** Token-level descriptive statistics of SPIRIT-CONSORT-TM. SD: standard deviation.

Table S2 presents descriptive statistics of the dataset at the sentence and article levels.

| Checklist Item                       | No. of articles | Avg. number of sentences per article (SD) | Range |
|--------------------------------------|-----------------|-------------------------------------------|-------|
| 1a_Title_Randomized                  | 168             | 0.85 (0.39)                               | 0-2   |
| 1b_Title_Type                        | 33              | 0.17 (0.37)                               | 0-1   |
| 1c_Title_Framework                   | 17              | 0.09 (0.28)                               | 0-1   |
| 1d_Title_Centers                     | 19              | 0.10 (0.29)                               | 0-1   |
| 1e_Title_Population                  | 188             | 0.95 (0.26)                               | 0-2   |
| 1f_Title_Intervention                | 189             | 0.95 (0.24)                               | 0-2   |
| 1g_Title_Acronym                     | 68              | 0.34 (0.47)                               | 0-1   |
| 2_Abstract_structured                | 184             | 0.92 (0.27)                               | 0-1   |
| 3a_Registry_number                   | 195             | 1.44 (0.68)                               | 0-5   |
| 3b_Protocol_access**                 | 90              | 0.81 (1.15)                               | 0-6   |
| 4_Funding                            | 188             | 2.71 (2.54)                               | 0-20  |
| 5a_Sponsor                           | 30              | 0.21 (0.55)                               | 0-3   |
| 5b_Contributors_roles                | 153             | 5.22 (4.59)                               | 0-36  |
| 5c_Oversight_committees              | 43              | 1.52 (9.03)                               | 0-87  |
| 7_Objectives                         | 198             | 2.85 (2.48)                               | 0-13  |
| 8a_Design_Type                       | 105             | 0.70 (0.83)                               | 0-5   |
| 8b_Design_Framework                  | 134             | 1.12 (1.15)                               | 0-6   |
| 8c_Design_Centers                    | 177             | 1.35 (0.87)                               | 0-4   |
| 8d_Design_Ratio                      | 148             | 0.99 (0.79)                               | 0-4   |
| 9_Setting                            | 186             | 2.22 (3.33)                               | 0-31  |
| 10a_Participants_inclusion           | 200             | 5.70 (6.18)                               | 1-40  |
| 10b_Center_interventionist_inclusion | 50              | 0.58 (1.56)                               | 0-11  |
| 11a_Intervention_Description         | 199             | 20.36 (19.74)                             | 0-122 |
| 11b_Intervention_Modification        | 45              | 0.50 (1.44)                               | 0-14  |
| 11c_Intervention_Monitoring          | 124             | 2.62 (4.97)                               | 0-45  |
| 11d_Intervention_Concomitant         | 104             | 1.63 (3.78)                               | 0-36  |

|                                             |     |               |       |
|---------------------------------------------|-----|---------------|-------|
| 12a_Outcomes_Definitions                    | 198 | 19.15 (19.42) | 0-116 |
| 12b_Outcomes_Changes**                      | 11  | 0.09 (0.44)   | 0-4   |
| 13_Participant_timeline                     | 103 | 1.85 (5.33)   | 0-60  |
| 14a_Sample_size                             | 183 | 1.42 (1.13)   | 0-11  |
| 14b_Sample_Calculation                      | 186 | 5.44 (6.35)   | 0-44  |
| 15_Recruitment                              | 143 | 2.51 (3.51)   | 0-26  |
| 16a_Randomization_Generation                | 143 | 0.78 (0.54)   | 0-2   |
| 16b_Randomization_Type                      | 142 | 0.99 (0.87)   | 0-6   |
| 16c_Randomization_Block_size                | 73  | 0.40 (0.56)   | 0-2   |
| 16d_Randomization_Strata                    | 104 | 0.62 (0.68)   | 0-3   |
| 16e_Allocation_Mechanism                    | 127 | 0.76 (0.89)   | 0-10  |
| 16f_Allocation_Concealment                  | 133 | 1.10 (1.22)   | 0-9   |
| 16g_Personnel_Sequence                      | 119 | 0.70 (0.72)   | 0-5   |
| 16h_Personnel_Enrollment                    | 96  | 0.74 (1.00)   | 0-6   |
| 17a_Masking_People_masked                   | 134 | 1.20 (1.23)   | 0-7   |
| 17b_Masking_Not_masked                      | 93  | 0.56 (0.68)   | 0-3   |
| 17c_Masking_Type                            | 109 | 0.78 (0.93)   | 0-5   |
| 17d_Masking_Unblinding                      | 22  | 0.21 (0.96)   | 0-9   |
| 17e_Masking_Similarity                      | 55  | 0.49 (0.99)   | 0-5   |
| 18a_Data_Collection                         | 174 | 7.97 (11.44)  | 0-84  |
| 18b_Data_Retention                          | 76  | 0.87 (1.55)   | 0-9   |
| 19_Data_Management                          | 79  | 1.43 (3.13)   | 0-23  |
| 20a_Statistical_methods_Outcomes            | 196 | 7.71 (7.43)   | 0-48  |
| 20b_Statistical_methods_Other_Analyses      | 101 | 1.52 (2.79)   | 0-19  |
| 20c_Statistical_methods_Analysis_population | 143 | 1.35 (1.35)   | 0-8   |
| 20d_Statistical_methods_Missing_data        | 89  | 0.74 (1.12)   | 0-7   |
| 21a_Data_monitoring_committee               | 58  | 0.88 (2.26)   | 0-20  |
| 21b_Interim_analyses                        | 42  | 0.52 (1.79)   | 0-19  |
| 21c_Stopping_guidelines                     | 28  | 0.40 (2.38)   | 0-32  |
| 22_Harms_non-systematic                     | 85  | 1.55 (4.16)   | 0-39  |
| 23_Auditing*                                | 18  | 0.27 (1.01)   | 0-7   |
| 24_Ethics                                   | 193 | 1.83 (2.48)   | 0-32  |
| 25_Amendments                               | 47  | 0.53 (1.44)   | 0-14  |
| 26a_Consent_Obtaining                       | 194 | 2.40 (2.89)   | 0-27  |
| 26b_Consent_Provisions*                     | 4   | 0.04 (0.27)   | 0-3   |
| 27_Confidentiality                          | 72  | 0.85 (1.83)   | 0-14  |
| 28_Financial_interests                      | 170 | 2.62 (4.46)   | 0-46  |
| 29_Data_access*                             | 24  | 0.19 (0.60)   | 0-4   |
| 30_Post_trial_care*                         | 16  | 0.17 (0.77)   | 0-8   |
| 31a_Dissemination                           | 37  | 0.57 (1.54)   | 0-11  |
| 31b_Authorship                              | 14  | 0.12 (0.59)   | 0-7   |
| 31c_Sharing_Materials                       | 24  | 0.23 (0.71)   | 0-6   |
| 31d_Sharing_Data                            | 82  | 0.99 (1.55)   | 0-13  |
| 31e_Sharing_Code                            | 7   | 0.05 (0.30)   | 0-3   |
| 32_Informed_consent_materials               | 8   | 0.05 (0.28)   | 0-3   |
| 33_Biological_specimens                     | 14  | 0.29 (1.30)   | 0-10  |
| 34_Flow**                                   | 98  | 2.16 (2.74)   | 0-12  |
| 35a_Recruitment_dates                       | 145 | 0.95 (0.78)   | 0-4   |
| 35b_Followup_dates                          | 74  | 0.43 (0.61)   | 0-3   |
| 35c_Stopping**                              | 15  | 0.11 (0.49)   | 0-5   |
| 36_Baseline_data**                          | 100 | 2.46 (3.65)   | 0-16  |
| 37a_Analysis_Numbers**                      | 82  | 0.79 (1.33)   | 0-10  |
| 38a_Outcome_results**                       | 99  | 9.20 (13.11)  | 0-70  |

|                        |    |             |      |
|------------------------|----|-------------|------|
| 38b_Binary_results**   | 64 | 1.55 (4.11) | 0-44 |
| 39_Ancillary_results** | 76 | 3.31 (8.01) | 0-88 |
| 40_Harms_results**     | 47 | 1.06 (2.87) | 0-23 |
| 41_Generalizability**  | 81 | 1.07 (1.95) | 0-12 |

**Table S2.** Sentence-level descriptive statistics of checklist items in SPIRIT-CONSORT-TM. SD: standard deviation. \*: SPIRIT-only items, \*\*: CONSORT-only items.

Table S3 shows the descriptive statistics of the term-level dataset at the item level.

| Checklist Item                              | No. of articles | No. of instances | Avg. frequency of terms per article (SD) | Range (# of annotations) | Avg. length of tokens (SD) | Range (token length) |
|---------------------------------------------|-----------------|------------------|------------------------------------------|--------------------------|----------------------------|----------------------|
| 1a_Title_Randomized                         | 168             | 172              | 0.86 (0.40)                              | 0-2                      | 1.02 (0.23)                | 1-4                  |
| 1b_Title_Type                               | 33              | 34               | 0.17 (0.39)                              | 0-2                      | 1.47 (0.85)                | 1-3                  |
| 1c_Title_Framework                          | 17              | 20               | 0.10(0.35)                               | 0-2                      | 1.15 (0.36)                | 1-2                  |
| 1d_Title_Centers                            | 19              | 19               | 0.10 (0.29)                              | 0-1                      | 1.74 (0.91)                | 1-3                  |
| 1e_Title_Population                         | 188             | 210              | 1.05 (0.48)                              | 0-4                      | 4.30 (3.06)                | 1-18                 |
| 1f_Title_Intervention                       | 189             | 245              | 1.23 (0.64)                              | 0-4                      | 4.24 (2.99)                | 1-16                 |
| 1g_Title_Acronym                            | 68              | 68               | 0.34 (0.47)                              | 0-1                      | 1.71 (1.09)                | 1-7                  |
| 3a_Registry_number                          | 195             | 304              | 1.52 (0.82)                              | 0-6                      | 1.19 (1.00)                | 1-13                 |
| 8a_Design_Type                              | 105             | 153              | 0.77 (0.99)                              | 0-7                      | 2.24 (1.77)                | 1-11                 |
| 8b_Design_Framework                         | 134             | 261              | 1.30 (1.54)                              | 0-10                     | 2.94 (4.85)                | 1-31                 |
| 8c_Design_Centers                           | 177             | 279              | 1.40 (0.96)                              | 0-6                      | 2.75 (2.01)                | 1-17                 |
| 8d_Design_Ratio                             | 148             | 206              | 1.03 (0.87)                              | 0-5                      | 4.00 (2.10)                | 2-14                 |
| 14a_Sample_size                             | 183             | 357              | 1.78 (1.42)                              | 0-13                     | 3.05 (3.24)                | 1-29                 |
| 16a_Randomization_Generation                | 143             | 154              | 0.77 (0.54)                              | 0-2                      | 4.55 (4.01)                | 1-22                 |
| 16b_Randomization_Type                      | 142             | 240              | 1.20 (1.06)                              | 0-6                      | 1.49 (1.29)                | 1-12                 |
| 16c_Randomization_Block_size                | 73              | 84               | 0.42 (0.60)                              | 0-3                      | 3.48 (3.15)                | 1-12                 |
| 16d_Randomization_Strata                    | 104             | 218              | 1.09 (1.39)                              | 0-8                      | 6.07 (7.16)                | 1-43                 |
| 17a_Masking_People_masked                   | 134             | 381              | 1.91 (2.04)                              | 0-13                     | 2.15 (2.10)                | 1-21                 |
| 17b_Masking_Not_masked                      | 93              | 167              | 0.83 (1.09)                              | 0-6                      | 2.08 (1.84)                | 1-10                 |
| 17c_Masking_Type                            | 109             | 157              | 0.79 (0.94)                              | 0-5                      | 2.74 (0.88)                | 1-9                  |
| 20c_Statistical_methods_Analysis_population | 143             | 352              | 1.76 (2.01)                              | 0-16                     | 7.28 (7.97)                | 1-72                 |
| 20d_Statistical_methods_Missing_data        | 89              | 150              | 0.75 (1.14)                              | 0-7                      | 7.89 (8.26)                | 1-45                 |

**Table S3.** Descriptive statistics regarding the annotation of term-level checklist items in SPIRIT-CONSORT-TM. SD: standard deviation.

Tables S4 and S5 show the NLP model performance over 5 runs at the sentence and article levels. 95% CIs are not included for brevity.

| Checklist Item      | Prec. | Recall | F1    |
|---------------------|-------|--------|-------|
| 1a_Title_Randomized | 0.899 | 1.000  | 0.946 |
| 1b_Title_Type       | 1.000 | 0.500  | 0.667 |

|                                             |       |       |       |
|---------------------------------------------|-------|-------|-------|
| 1c_Title_Framework                          | 0.000 | 0.000 | 0.000 |
| 1d_Title_Centers                            | 1.000 | 0.933 | 0.960 |
| 1e_Title_Population                         | 0.897 | 0.979 | 0.936 |
| 1f_Title_Intervention                       | 0.917 | 0.959 | 0.937 |
| 1g_Title_Acronym                            | 0.986 | 0.943 | 0.964 |
| 3a_Registry_number                          | 0.900 | 0.949 | 0.923 |
| 3b_Protocol_access                          | 0.824 | 0.766 | 0.793 |
| 4_Funding                                   | 0.894 | 0.906 | 0.900 |
| 5a_Sponsor                                  | 0.767 | 0.680 | 0.708 |
| 5b_Contributors_roles                       | 0.984 | 0.963 | 0.973 |
| 5c_Oversight_committees                     | 0.584 | 0.700 | 0.635 |
| 7_Objectives                                | 0.835 | 0.860 | 0.845 |
| 8a_Design_Type                              | 0.929 | 0.439 | 0.593 |
| 8b_Design_Framework                         | 0.598 | 0.621 | 0.608 |
| 8c_Design_Centers                           | 0.633 | 0.512 | 0.566 |
| 8d_Design_Ratio                             | 0.822 | 0.657 | 0.730 |
| 9_Setting                                   | 0.801 | 0.611 | 0.693 |
| 10a_Participants_inclusion                  | 0.908 | 0.874 | 0.891 |
| 10b_Center_interventionist_inclusion        | 0.500 | 0.227 | 0.303 |
| 11a_Intervention_Description                | 0.807 | 0.910 | 0.855 |
| 11b_Intervention_Modification               | 0.240 | 0.100 | 0.133 |
| 11c_Intervention_Monitoring                 | 0.591 | 0.543 | 0.561 |
| 11d_Intervention_Concomitant                | 0.687 | 0.337 | 0.451 |
| 12a_Outcomes_Definitions                    | 0.787 | 0.672 | 0.724 |
| 12b_Outcomes_Changes**                      | 0.000 | 0.000 | 0.000 |
| 13_Participant_timeline                     | 0.447 | 0.530 | 0.481 |
| 14a_Sample_size                             | 0.732 | 0.646 | 0.685 |
| 14b_Sample_Calculation                      | 0.876 | 0.855 | 0.865 |
| 15_Recruitment                              | 0.554 | 0.737 | 0.632 |
| 16a_Randomization_Generation                | 0.881 | 0.893 | 0.887 |
| 16b_Randomization_Type                      | 0.818 | 0.844 | 0.828 |
| 16c_Randomization_Block_size                | 0.969 | 0.871 | 0.917 |
| 16d_Randomization_Strata                    | 0.910 | 0.657 | 0.761 |
| 16e_Allocation_Mechanism                    | 0.581 | 0.539 | 0.556 |
| 16f_Allocation_Concealment                  | 0.587 | 0.594 | 0.588 |
| 16g_Personnel_Sequence                      | 0.642 | 0.627 | 0.632 |
| 16h_Personnel_Enrollment                    | 0.343 | 0.353 | 0.344 |
| 17a_Masking_People_masked                   | 0.857 | 0.816 | 0.836 |
| 17b_Masking_Not_masked                      | 0.797 | 0.520 | 0.626 |
| 17c_Masking_Type                            | 0.926 | 0.610 | 0.729 |
| 17d_Masking_Unblinding                      | 0.400 | 0.400 | 0.394 |
| 17e_Masking_Similarity                      | 0.661 | 0.346 | 0.453 |
| 18a_Data_Collection                         | 0.390 | 0.527 | 0.447 |
| 18b_Data_Retention                          | 0.845 | 0.473 | 0.606 |
| 19_Data_Management                          | 0.737 | 0.609 | 0.666 |
| 20a_Statistical_methods_Outcomes            | 0.713 | 0.675 | 0.692 |
| 20b_Statistical_methods_Other_Analyses      | 0.603 | 0.565 | 0.582 |
| 20c_Statistical_methods_Analysis_population | 0.783 | 0.694 | 0.735 |
| 20d_Statistical_methods_Missing_data        | 0.785 | 0.639 | 0.703 |
| 21a_Data_monitoring_committee               | 0.844 | 0.507 | 0.633 |
| 21b_Interim_analyses                        | 0.913 | 0.392 | 0.548 |
| 21c_Stopping_guidelines                     | 0.764 | 0.919 | 0.832 |
| 22_Harms_non-systematic                     | 0.863 | 0.836 | 0.848 |

|                               |       |       |       |
|-------------------------------|-------|-------|-------|
| 23_Auditing*                  | 0.383 | 0.600 | 0.465 |
| 24_Ethics                     | 0.872 | 0.881 | 0.876 |
| 25_Amendments                 | 0.878 | 0.560 | 0.677 |
| 26a_Consent_Obtaining         | 0.782 | 0.734 | 0.757 |
| 26b_Consent_Provisions*       | N/A   | N/A   | N/A   |
| 27_Confidentiality            | 0.752 | 0.686 | 0.716 |
| 28_Financial_interests        | 0.952 | 0.957 | 0.954 |
| 29_Data_access*               | 0.755 | 0.767 | 0.744 |
| 30_Post_trial_care            | 0.333 | 0.050 | 0.084 |
| 31a_Dissemination             | 0.819 | 0.900 | 0.857 |
| 31b_Authorship                | 0.828 | 0.533 | 0.640 |
| 31c_Sharing_Materials         | 0.400 | 0.200 | 0.266 |
| 31d_Sharing_Data              | 0.750 | 0.929 | 0.829 |
| 31e_Sharing_Code              | N/A   | N/A   | N/A   |
| 32_Informed_consent_materials | 0.000 | 0.000 | 0.000 |
| 33_Biological_specimens       | 0.058 | 0.200 | 0.090 |
| 34_Flow**                     | 0.705 | 0.861 | 0.775 |
| 35a_Recruitment_dates         | 0.818 | 0.842 | 0.830 |
| 35b_Followup_dates            | 0.841 | 0.533 | 0.653 |
| 35c_Stopping                  | 0.800 | 0.266 | 0.400 |
| 36_Baseline_data              | 0.816 | 0.683 | 0.741 |
| 37a_Analysis_Numbers          | 0.306 | 0.261 | 0.271 |
| 38a_Outcome_results           | 0.802 | 0.846 | 0.824 |
| 38b_Binary_results            | 0.361 | 0.529 | 0.427 |
| 39_Ancillary_results          | 0.760 | 0.481 | 0.588 |
| 40_Harms_results              | 0.912 | 0.892 | 0.901 |
| 41_Generalizability           | 0.469 | 0.433 | 0.450 |
| Micro-Average                 | 0.756 | 0.729 | 0.742 |
| Macro-Average                 | 0.702 | 0.624 | 0.645 |

**Table S4.** Item-level performance of the sentence classification model for each item. Items with NA for performance did not have any instances in the test set.

| Checklist Item          | Prec. | Recall | F1    |
|-------------------------|-------|--------|-------|
| 1a_Title_Randomized     | 0.952 | 1.000  | 0.975 |
| 1b_Title_Type           | 1.000 | 0.500  | 0.667 |
| 1c_Title_Framework      | 0.000 | 0.000  | 0.000 |
| 1d_Title_Centers        | 1.000 | 0.933  | 0.960 |
| 1e_Title_Population     | 0.949 | 0.979  | 0.964 |
| 1f_Title_Intervention   | 0.954 | 0.979  | 0.966 |
| 1g_Title_Acronym        | 0.986 | 0.943  | 0.964 |
| 2_Abstract_structured   | 0.971 | 0.971  | 0.971 |
| 3a_Registry_number      | 0.974 | 0.995  | 0.984 |
| 3b_Protocol_access      | 0.931 | 0.941  | 0.936 |
| 4_Funding               | 0.979 | 0.984  | 0.982 |
| 5a_Sponsor              | 0.767 | 0.760  | 0.737 |
| 5b_Contributors_roles   | 1.000 | 0.933  | 0.966 |
| 5c_Oversight_committees | 0.762 | 0.785  | 0.769 |
| 7_Objectives            | 0.979 | 0.944  | 0.961 |
| 8a_Design_Type          | 0.948 | 0.615  | 0.743 |
| 8b_Design_Framework     | 0.887 | 0.740  | 0.806 |
| 8c_Design_Centers       | 0.856 | 0.662  | 0.745 |
| 8d_Design_Ratio         | 0.930 | 0.810  | 0.865 |

|                                             |       |       |       |
|---------------------------------------------|-------|-------|-------|
| 9_Setting                                   | 0.924 | 0.794 | 0.854 |
| 10a_Participants_inclusion                  | 1.000 | 0.975 | 0.987 |
| 10b_Center_interventionist_inclusion        | 0.580 | 0.433 | 0.489 |
| 11a_Intervention_Description                | 0.989 | 0.909 | 0.947 |
| 11b_Intervention_Modification               | 0.327 | 0.249 | 0.279 |
| 11c_Intervention_Monitoring                 | 0.732 | 0.774 | 0.745 |
| 11d_Intervention_Concomitant                | 0.660 | 0.609 | 0.631 |
| 12a_Outcomes_Definitions                    | 1.000 | 0.985 | 0.992 |
| 12b_Outcomes_Changes**                      | 0.000 | 0.000 | 0.000 |
| 13_Participant_timeline                     | 0.654 | 0.664 | 0.657 |
| 14a_Sample_size                             | 0.905 | 0.837 | 0.869 |
| 14b_Sample_Calculation                      | 0.967 | 1.000 | 0.983 |
| 15_Recruitment                              | 0.734 | 0.843 | 0.783 |
| 16a_Randomization_Generation                | 0.963 | 0.911 | 0.936 |
| 16b_Randomization_Type                      | 0.929 | 0.918 | 0.922 |
| 16c_Randomization_Block_size                | 0.969 | 0.938 | 0.953 |
| 16d_Randomization_Strata                    | 1.000 | 0.733 | 0.844 |
| 16e_Allocation_Mechanism                    | 0.705 | 0.597 | 0.642 |
| 16f_Allocation_Concealment                  | 0.816 | 0.745 | 0.776 |
| 16g_Personnel_Sequence                      | 0.686 | 0.793 | 0.735 |
| 16h_Personnel_Enrollment                    | 0.480 | 0.640 | 0.546 |
| 17a_Masking_People_masked                   | 1.000 | 0.924 | 0.960 |
| 17b_Masking_Not_masked                      | 0.931 | 0.564 | 0.703 |
| 17c_Masking_Type                            | 1.000 | 0.822 | 0.900 |
| 17d_Masking_Unblinding                      | 0.800 | 0.433 | 0.560 |
| 17e_Masking_Similarity                      | 0.749 | 0.531 | 0.619 |
| 18a_Data_Collection                         | 0.812 | 0.843 | 0.826 |
| 18b_Data_Retention                          | 0.880 | 0.715 | 0.785 |
| 19_Data_Management                          | 0.892 | 0.982 | 0.933 |
| 20a_Statistical_methods_Outcomes            | 0.974 | 0.949 | 0.961 |
| 20b_Statistical_methods_Other_Analyses      | 0.602 | 0.537 | 0.564 |
| 20c_Statistical_methods_Analysis_population | 0.902 | 0.842 | 0.869 |
| 20d_Statistical_methods_Missing_data        | 0.924 | 0.708 | 0.800 |
| 21a_Data_monitoring_committee               | 0.901 | 0.880 | 0.888 |
| 21b_Interim_analyses                        | 0.800 | 0.571 | 0.667 |
| 21c_Stopping_guidelines                     | 0.734 | 0.800 | 0.759 |
| 22_Harms_non-systematic                     | 0.875 | 0.789 | 0.829 |
| 23_Auditing*                                | 0.383 | 0.500 | 0.427 |
| 24_Ethics                                   | 0.973 | 1.000 | 0.986 |
| 25_Amendments                               | 0.889 | 0.750 | 0.809 |
| 26a_Consent_Obtaining                       | 0.983 | 0.937 | 0.960 |
| 26b_Consent_Provisions*                     | N/A   | N/A   | N/A   |
| 27_Confidentiality                          | 0.903 | 0.775 | 0.833 |
| 28_Financial_interests                      | 1.000 | 0.977 | 0.989 |
| 29_Data_access*                             | 0.750 | 0.800 | 0.755 |
| 30_Post_trial_care                          | 0.300 | 0.090 | 0.133 |
| 31a_Dissemination                           | 0.863 | 0.857 | 0.856 |
| 31b_Authorship                              | 0.767 | 0.600 | 0.662 |
| 31c_Sharing_Materials                       | 0.400 | 0.200 | 0.266 |
| 31d_Sharing_Data                            | 0.953 | 1.000 | 0.975 |
| 31e_Sharing_Code                            | N/A   | N/A   | N/A   |
| 32_Informed_consent_materials               | 0.000 | 0.000 | 0.000 |
| 33_Biological_specimens                     | 0.350 | 0.400 | 0.371 |

|                       |       |       |       |
|-----------------------|-------|-------|-------|
| 34_Flow**             | 0.796 | 1.000 | 0.885 |
| 35a_Recruitment_dates | 0.881 | 0.926 | 0.902 |
| 35b_Followup_dates    | 0.850 | 0.660 | 0.741 |
| 35c_Stopping          | 0.800 | 0.266 | 0.400 |
| 36_Baseline_data      | 0.918 | 1.000 | 0.957 |
| 37a_Analysis_Numbers  | 0.400 | 0.435 | 0.406 |
| 38a_Outcome_results   | 0.990 | 1.000 | 0.995 |
| 38b_Binary_results    | 0.711 | 0.983 | 0.820 |
| 39_Ancillary_results  | 0.695 | 0.759 | 0.725 |
| 40_Harms_results      | 0.896 | 0.933 | 0.913 |
| 41_Generalizability   | 0.636 | 0.710 | 0.671 |
| Micro-Average         | 0.887 | 0.845 | 0.865 |
| Macro-Average         | 0.799 | 0.744 | 0.761 |

**Table S5.** Article-level performance of the sentence classification model for each item. Items with NA for performance did not have any instances in the test set.

Table S6 shows the results of the term recognition model at the item level. 95% CIs are not included for brevity.

| Checklist Item                              | Strict |        |       | Lenient |        |       |
|---------------------------------------------|--------|--------|-------|---------|--------|-------|
|                                             | Prec.  | Recall | F1    | Prec.   | Recall | F1    |
| 1a_Title_Randomized                         | 1.000  | 1.000  | 1.000 | 1.000   | 1.000  | 1.000 |
| 1b_Title_Type                               | 1.000  | 0.500  | 0.667 | 1.000   | 0.500  | 0.667 |
| 1c_Title_Framework                          | 1.000  | 0.250  | 0.400 | 1.000   | 0.250  | 0.400 |
| 1d_Title_Centers                            | 1.000  | 0.333  | 0.500 | 1.000   | 0.333  | 0.500 |
| 1e_Title_Population                         | 0.514  | 0.475  | 0.494 | 0.892   | 0.825  | 0.857 |
| 1f_Title_Intervention                       | 0.568  | 0.532  | 0.550 | 0.857   | 0.766  | 0.809 |
| 1g_Title_Acronym                            | 0.846  | 0.786  | 0.815 | 0.923   | 0.857  | 0.889 |
| 3a_Registry_number                          | 0.873  | 0.965  | 0.917 | 0.889   | 0.983  | 0.933 |
| 8a_Design_Type                              | 0.611  | 0.393  | 0.478 | 0.706   | 0.429  | 0.533 |
| 8b_Design_Framework                         | 0.264  | 0.434  | 0.329 | 0.337   | 0.528  | 0.412 |
| 8c_Design_Centers                           | 0.568  | 0.438  | 0.494 | 0.595   | 0.458  | 0.518 |
| 8d_Design_Ratio                             | 0.774  | 0.585  | 0.667 | 0.903   | 0.683  | 0.778 |
| 14a_Sample_size                             | 0.521  | 0.576  | 0.547 | 0.548   | 0.606  | 0.576 |
| 16a_Randomization_Generation                | 0.409  | 0.300  | 0.346 | 0.895   | 0.567  | 0.694 |
| 16b_Randomization_Type                      | 0.629  | 0.512  | 0.564 | 0.800   | 0.651  | 0.718 |
| 16c_Randomization_Block_size                | 0.714  | 0.357  | 0.476 | 0.857   | 0.429  | 0.571 |
| 16d_Randomization_Strata                    | 0.500  | 0.303  | 0.377 | 0.737   | 0.424  | 0.538 |
| 17a_Masking_People_masked                   | 0.544  | 0.595  | 0.568 | 0.701   | 0.726  | 0.713 |
| 17b_Masking_Not_masked                      | 1.000  | 0.050  | 0.095 | 1.000   | 0.050  | 0.095 |
| 17c_Masking_Type                            | 0.838  | 0.775  | 0.805 | 0.865   | 0.800  | 0.831 |
| 20c_Statistical_methods_Analysis_population | 0.410  | 0.333  | 0.368 | 0.513   | 0.417  | 0.460 |
| 20d_Statistical_methods_Missing_data        | 0.500  | 0.273  | 0.353 | 0.722   | 0.394  | 0.510 |
| OVERALL                                     | 0.585  | 0.532  | 0.557 | 0.712   | 0.633  | 0.670 |

**Table S6.** Item-level performance from our term extraction model (PURE model with section header and relative position extension). Note that this table provides the item-level result from a single run; therefore the overall results differ from those in Table 4 of the main manuscript.
